# Supplementary material for: Functional characterization of rare FOXP2 variants in neurodevelopmental disorder
Source: PubMed Central journal article supplement (PMC5126810; doi:10.1186/s11689-016-9177-2), 2016-11-28
Supplement: 11689_2016_9177_MOESM1_ESM.pdf [file 11689_2016_9177_MOESM1_ESM.pdf]

**Additional file 1** DNA sequences of primers used for molecular cloning

| Construct      | Forward primer <sup>a</sup>            | Site  | Reverse primer <sup>a</sup>              | Site |
|----------------|----------------------------------------|-------|------------------------------------------|------|
| CTBP2          | GAGGATCCTGGCCCTTGTG<br>GATAAGCACAAAGTC | BamHI | AGTCTAGACTATTGCTCGTTGGG<br>GTGCTCTCGATTG | XbaI |
| FOXP2<br>R328* | AGGGATCCAAGAATCTGGG<br>ACTGAGACA       | BamHI | CTCTAGATTATCTTGCACTTAGA<br>ACTGAAG       | XbaI |
| FOXP2<br>670*  | AGGGATCCAAGAATCTGGG<br>ACTGAGACA       | BamHI | GTCTAGATTATATGTGCGGCTGA<br>GGTGAGC       | XbaI |
| FOXP2<br>614*  | AGGGATCCAAGAATCTGGG<br>ACTGAGACA       | BamHI | GTCTAGATTACTGCAAAGTGGCA<br>TTAAGAG       | XbaI |
| FOXP2<br>488*  | AGGGATCCAAGAATCTGGG<br>ACTGAGACA       | BamHI | GTCTAGACATGGGAATGTTGTAT<br>TTGTC         | XbaI |
| FOXP2<br>423*  | AGGGATCCAAGAATCTGGG<br>ACTGAGACA       | BamHI | GTCTAGAAGGTTTGGGAGATGG<br>TTTGGG         | XbaI |
| FOXP2<br>330*  | AGGGATCCAAGAATCTGGG<br>ACTGAGACA       | BamHI | GTCTAGAGTCTCGTCTTGCACTT<br>AGAAC         | XbaI |
| FOXP2<br>259*  | AGGGATCCAAGAATCTGGG<br>ACTGAGACA       | BamHI | GTCTAGATTGAGGCAGCGATTG<br>GACAGG         | XbaI |

<sup>a</sup> Restriction sites are underlined
