# Supplementary material for: Functional characterization of rare FOXP2 variants in neurodevelopmental disorder
Source: PubMed Central journal article supplement (PMC5126810; doi:10.1186/s11689-016-9177-2), 2016-11-28
Supplement: 11689_2016_9177_MOESM2_ESM.pdf [file 11689_2016_9177_MOESM2_ESM.pdf]

**Additional file 2** DNA sequences of primers used for site-directed mutagenesis

| Variant     | Primer 1                                        | Primer 2                                           |
|-------------|-------------------------------------------------|----------------------------------------------------|
| p.Q17L      | GCAACAGTTCAATGAATCTAAATGGA<br>ATGAGCACTCTAAG    | GCTTAGAGTGCTCATTCCATTTAGATTCAT<br>TGAAGTGTTC       |
| p.Q390Vfs*7 | TGCGACCCTCAGAGACCAAACCATCT<br>CCC               | TAGAAAGCTGTATTTCTAACTTGCACCAC<br>CTGCATTTGC        |
| p.M406T     | ACGTCTTCAAGCAATGACGACCCACT<br>TGCACATG          | GCATGTGCAAGTGGGTCGTCATTGCTTGA<br>AGACGT            |
| p.P416T     | TGCGACCCTCAGAGACCAAACCATCT<br>CCC               | GGGAGATGGTTTGGTCTCTGAGGGTCGC<br>A                  |
| p.R553H     | CTTGAAGAATGCAGTACATCATAAT<br>CTTAGCCTGCAC       | GTGCAGGCTAAGATTATGATGTAAGTGCAT<br>TCTTCCAAG        |
| p.N597H     | ATAACAGGAAGTCCAACCTTAGTAAA<br>ACATATACCAGTTTTAG | CTAAACTGGTAGGTATATGTTTTACTAAG<br>GTTGGACTTCCTGTTAT |
| p.N303T     | CTCGACTACCTCCTCCACCACTTCCA<br>AAGCATCAC         | GTGATGCTTTGGAAGTGGTGGAGGAGGT<br>AGTCGAG            |
| p.S325N     | GTGAATGGACAGTCTTCAGTTCTAAA<br>TGCAAGACGAGAC     | GTCTCGTCTTGCATTTAGAAGTGAAGACT<br>GTCCATTCAC        |
