# Supplementary material for: Functional characterization of rare FOXP2 variants in neurodevelopmental disorder
Source: PubMed Central journal article supplement (PMC5126810; doi:10.1186/s11689-016-9177-2), 2016-11-28

### Additional file 3 Western blots of YFP-tagged FOXP2 variants

HEK293 cells were transfected with YFP-FOXP2 and blots of whole cell lysate were probed with anti-YFP to detect FOXP2 and with anti- $\beta$ -actin to confirm equal loading.

Rare FOXP2 variants found in individuals with neurodevelopmental disorders.

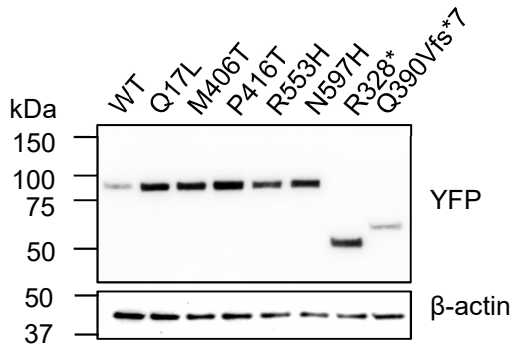

### Synthetic truncated forms of FOXP2

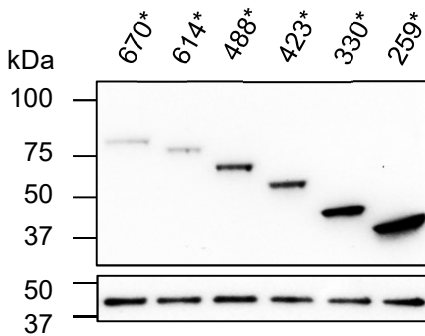

### FOXP2 variants with ancestral amino acid substitutions

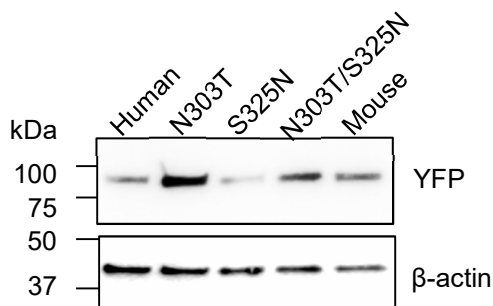

### Synthetic FOXP2 variants with reduced polyglutamine tracts

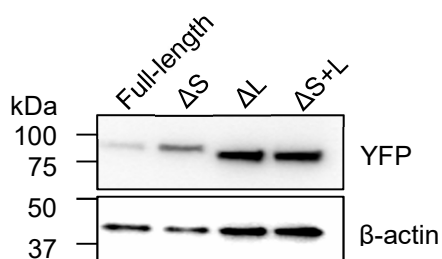

Supplement: 11689_2016_9177_MOESM3_ESM.pdf [file 11689_2016_9177_MOESM3_ESM.pdf]
