# Supplementary material for: Functional characterization of rare FOXP2 variants in neurodevelopmental disorder
Source: PubMed Central journal article supplement (PMC5126810; doi:10.1186/s11689-016-9177-2), 2016-11-28
Supplement: 11689_2016_9177_MOESM4_ESM.pdf [file 11689_2016_9177_MOESM4_ESM.pdf]

**Additional file 4** Summary of studies examining FOXP2 polyglutamine tract length variation in individuals with neurodevelopmental and neuropsychiatric disorders

| <b>Individuals screened</b>                                                                          | <b>Polyglutamine tract variations observed</b>                                                                        | <b>Reference</b>        |
|------------------------------------------------------------------------------------------------------|-----------------------------------------------------------------------------------------------------------------------|-------------------------|
| 48 probands from multiplex autism families, 43 probands from SLI families.                           | 10Q->12Q in one proband with SLI; inherited but did not segregate with disorder.                                      | Newbury et al. (2002)   |
| 75 families with sibling pairs with autism + 60 independent autistic probands. 160 controls.         | 40Q->34Q in mother and proband of one trio. 40Q->35Q in mother and both probands of one affected sibling pair family. | Wassink et al. (2002)   |
| 72 autism cases + 98 controls.                                                                       | No variation observed.                                                                                                | Gauthier et al. (2003)  |
| 53 autism cases + 50 controls.                                                                       | 40Q->39Q in 4 cases and 2 controls.                                                                                   | Li et al. (2005)        |
| 49 CAS probands.                                                                                     | 40Q->44Q in one proband; absent from affected sibling. Parental genotypes unknown.                                    | MacDermot et al. (2005) |
| 247 schizophrenia cases, 98 autism cases, 56 idiopathic intellectual disability cases, 314 controls. | 40Q->36Q in one autism case; inherited from father. 40Q->44Q in one autism case. Parental genotypes unknown.          | Laroche et al. (2008)   |
| 150 speech sound disorder cases + 120 controls.                                                      | 40Q->39Q in 5 cases.                                                                                                  | Zhao et al. (2010)      |
| 293 schizophrenia cases + 340 controls.                                                              | No variation observed.                                                                                                | Tolosa et al. (2010)    |
| 95 schizophrenia cases.                                                                              | No variation observed.                                                                                                | Levchenko et al. (2014) |

SLI, specific language impairment  
CAS, childhood apraxia of speech.
