# Supplementary material for: Functional characterization of rare FOXP2 variants in neurodevelopmental disorder
Source: PubMed Central journal article supplement (PMC5126810; doi:10.1186/s11689-016-9177-2), 2016-11-28
Supplement: 11689_2016_9177_MOESM5_ESM.pdf [file 11689_2016_9177_MOESM5_ESM.pdf]

**Additional file 5** FOXP2 polyglutamine tract lengths in selected vertebrates

| Taxon               | Species                                      | Number of Q residues <sup>a</sup> |             | UniProt             |
|---------------------|----------------------------------------------|-----------------------------------|-------------|---------------------|
|                     |                                              | Long tract                        | Short tract |                     |
| Primates            | Human ( <i>Homo sapiens</i> )                | 40                                | 10          | O15409              |
|                     | Chimpanzee ( <i>Pan troglodytes</i> )        | 41                                | 10          | Q8MJA0              |
|                     | Bonobo ( <i>Pan paniscus</i> )               | 41                                | 10          | Q8HZ00              |
|                     | Gorilla ( <i>Gorilla gorilla gorilla</i> )   | 38                                | 10          | Q8MJ99              |
|                     | Baboon ( <i>Papio anubis</i> )               | 39                                | 10          | A9RAA3              |
|                     | Orangutan ( <i>Pongo pygmaeus</i> )          | 39                                | 9           | Q8MJ98              |
|                     | Orangutan ( <i>Pongo abelii</i> )            | 39                                | 9           | H2PN93              |
|                     | Gibbon ( <i>Hylobates lar</i> )              | 39                                | 9           | Q5QL03              |
|                     | Gibbon ( <i>Nomascus leucogenys</i> )        | 39                                | 10          | G1RL29              |
|                     | Macaque ( <i>Macaca mulatta</i> )            | 39                                | 10          | Q8MJ97              |
|                     | Marmoset ( <i>Callithrix jacchus</i> )       | 38                                | 10          | F7IHC2              |
|                     | Bushbaby ( <i>Otolemur garnettii</i> )       | 38                                | 10          | B5FWC6              |
| Non-primate mammals | Mouse ( <i>Mus musculus</i> )                | 40                                | 9           | P58463              |
|                     | Rat ( <i>Rattus norvegicus</i> )             | 36                                | 9           | P0CF24              |
|                     | Opossum ( <i>Monodelphis domestica</i> )     | 39                                | 5           | F7F0A1              |
|                     | Platypus ( <i>Ornithorhynchus anatinus</i> ) | 36                                | 9           | F7F7P1              |
| Birds and reptiles  | Chicken ( <i>Gallus gallus</i> )             | 38                                | 5           | F1NY57              |
|                     | Zebra finch ( <i>Taeniopygia guttata</i> )   | 38                                | 8           | K4EPC4              |
| Amphibians          | Frog ( <i>Xenopus laevis</i> )               | 35                                | 3           | Q4VYS1              |
|                     | Frog ( <i>Xenopus tropicalis</i> )           | 38                                | 2           | A4IIF5              |
|                     | Turtle ( <i>Pelodiscus sinensis</i> )        | 37                                | 3           | K7G4L3              |
| Lobe-finned fish    | Coelacanth ( <i>Latimeria chalumnae</i> )    | 25                                | 6           | H3AY31 <sup>b</sup> |
| Ray-finned fish     | Zebrafish ( <i>Danio rerio</i> )             | 3                                 | 7           | Q4JNX5              |
|                     | Pufferfish ( <i>Takifugu rubripes</i> )      | 3                                 | 6           | V6F872              |
|                     | Pufferfish ( <i>Tetraodon nigroviridis</i> ) | 3                                 | 6           | V6F979              |
|                     | Tilapia ( <i>Oreochromis niloticus</i> )     | 3                                 | 7           | V6F808              |

<sup>a</sup> Determined using protein sequences from the UniProt database

<sup>b</sup> This protein sequence is not annotated as FOXP2 in the UniProt database but is identified as a 1-to-1 orthologue of human FOXP2 by the Ensembl genome browser.
